# Supplementary material for: Astaxanthin reduces fat storage in a fat-6/fat-7 dependent manner determined using high fat Caenorhabditis elegans
Source: Royal Society of Chemistry journal article supplement (doi:10.1039/d3fo01403g), 2023-01-01
Supplement: d3fo01403g1.pdf [file d3fo01403g1.pdf]

## Supplementary material

### **Astaxanthin reduces fat storage in *fat-6/fat-7* dependent manner determined by *Caenorhabditis elegans*—a critical and unique tool**

Junting Xie<sup>†,‡</sup>, Xiaoning Hou<sup>†,‡</sup>, Wanshi He<sup>†,‡</sup>, Jie Xiao<sup>†,‡</sup>, Yong Cao<sup>†,‡</sup>, Xiaojuan Liu<sup>\*,†,‡</sup>

<sup>†</sup> Guangdong Provincial Key Laboratory of Nutraceuticals and Functional Foods,  
College of Food Science, South China Agricultural University, Guangzhou, 510642,  
Guangdong China

<sup>‡</sup> Guangdong Laboratory for Lingnan Modern Agriculture, Guangzhou 510642, China

Figure S1. Trend of the growth of *E.coli* OP50 treating with astaxanthin

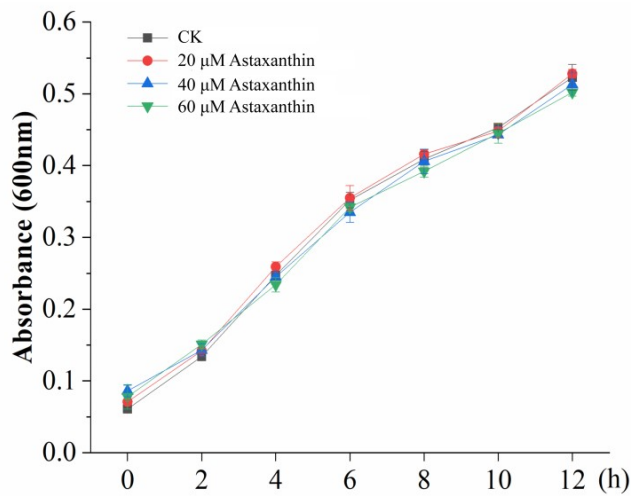

**Table 1**

Real-time fluorescent quantitative PCR primers.

| Source        | Forward primer sequence (5' to 3') | Reverse primer sequence (5' to 3') |
|---------------|------------------------------------|------------------------------------|
| <i>act-1</i>  | CTGTCCTCTCCCTCTACGCTTCC            | CAGTAAGATCACGTCCAGCCAAGTC          |
| <i>fat-5</i>  | GCCCTCTTCCGTTACTGCTTCAC            | CTTCTCCGACTGCCGCAATAGATG           |
| <i>fat-6</i>  | GCGCTGCTCACTATTTTCGGATGG           | GTGGGAATGTGTGATGGAAGTTGTG          |
| <i>fat-7</i>  | GCTGACGAGAAGCCAGTTCTTC             | GAGACCTCGTCAATCATTTCACCAC          |
| <i>sbp-1</i>  | CATGAATTCATTCGAGGGAGACGTCCC        | CATGAATTCCTGATGTGGAGTCATCGC        |
| <i>mdt-15</i> | ATGCTATGTTGGGTAATGGTCAGGTG         | CTGCTGTTGGTGTGCTGTTGATG            |
| <i>nhr-49</i> | CTTCGGATTGGCAGAGGTGGATTC           | CGGCTGGATTAAACGGAGATACCC           |
| <i>acs-2</i>  | ACGCCTCGCATTCTCTCCTCTC             | TGTTGGTGGAAGAAGCATCCTTGG           |
| <i>aak-2</i>  | CATATCATCCGCCTCTACCAAGTCATC        | CGTCCGTGCTTAACAATGTAGTCAAAG        |
| <i>nhr-80</i> | ATGGAGTTGGCTGGGAGGATGAG            | AGGCATGATCTCGTCGGTGATTTG           |
| <i>daf-2</i>  | TATGTGGCGTGAGAATGAAGTGAGC          | CTGGCTTATCGGCTACAATCGTCTC          |
| <i>daf-16</i> | CCACCACCATCATAACGAGTTG             | CATTGGCTTGAAGTTAGTGCTTGGC          |
